# Supplementary material for: A Similar Lifetime CV Risk and a Similar Cardiometabolic Profile in the Moderate and High Cardiovascular Risk Populations: A Population-Based Study
Source: PubMed Central journal article supplement (PMC8069041; doi:10.3390/jcm10081584), 2021-04-09
Supplement: jcm-10-01584-s001.pdf [file jcm-10-01584-s001.pdf]

Table S1. Results of SWLS, EQ-VAS, BDI analysis in general population

| Variable                        |     | SWLS     | P     | EQ-VAS    | P      | BDI       | P      |
|---------------------------------|-----|----------|-------|-----------|--------|-----------|--------|
| History of hypertension         | no  | 23.4±5.3 | 0.019 | 79.1±13.7 | <0.001 | 6.5±6.3   | <0.001 |
|                                 | yes | 22.4±5.2 |       | 70.8±15.9 |        | 8.4±7.1   |        |
| History of hypercholesterolemia | no  | 23.4±5.2 | 0.041 | 77.9±14.9 | <0.001 | 6.6±6.5   | <0.001 |
|                                 | yes | 22.5±5.5 |       | 73.8±14.4 |        | 8.0±6.7   |        |
| History of diabetes             | no  | 23.1±5.3 | 0.215 | 77.4±14.5 | <0.001 | 6.8±6.5   | <0.001 |
|                                 | yes | 22.4±4.8 |       | 66.9±15.9 |        | 10.21±7.2 |        |
| BP ≥140 and/or ≥90mmHg          | no  | 23.1±5.4 | 0.674 | 77.1±14.8 | 0.047  | 7.1±6.5   | 0.484  |
|                                 | yes | 22.9±5.0 |       | 75.3±14.9 |        | 6.9±6.8   |        |
| Hypercholesterolemia*           | no  | 23.2±5.4 | 0.717 | 80.1±13.5 | <0.001 | 7.0±6.3   | 0.924  |
|                                 | yes | 23.0±5.3 |       | 75.3±15.1 |        | 7.0±6.7   |        |
| Hyperglycemia**                 | no  | 23.2±5.3 | 0.939 | 78.0±14.3 | <0.001 | 6.7±6.5   | 0.002  |
|                                 | yes | 23.2±5.2 |       | 71.4±13.9 |        | 8.6±6.5   |        |

BDI: Beck Depression Inventory; BP: blood pressure; CV: cardiovascular; EQ-VA: Euro Quality of Life Visual Analogue Scale; LDL-C: low-density cholesterol; OGTT: oral glucose tolerance test; SWLS: Satisfaction With Life Scale

\*Total cholesterol >190mg% or LDL-C >116mg% in low CV class, >100mg% in moderate CV class, >70mg% in high CV class, >55mg% in very-high CV class;

\*\* Fasting glucose ≥ 126 mg/dl or OGTT 120min. ≥ 200mg/dl
